# Supplementary material
Source: PubMed Central journal article supplement (PMC5531043)
Supplement: NIHMS841916-supplement-1.pdf [file NIHMS841916-supplement-1.pdf]

**A**  $\Phi$ X174 digital PCR readings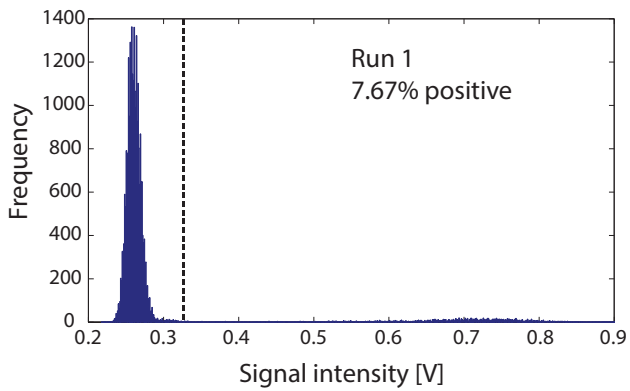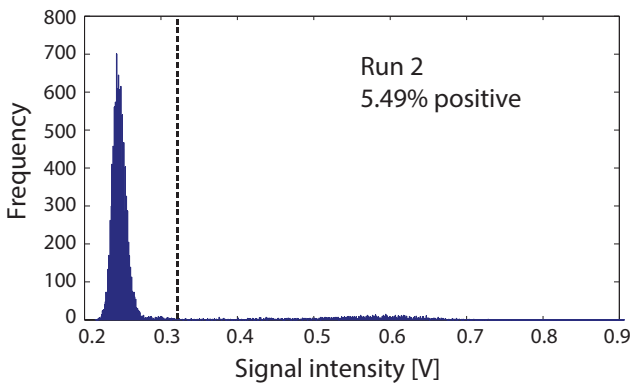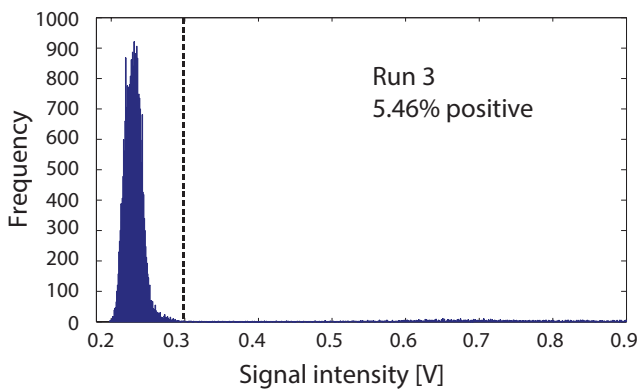**B**  $\Phi$ X174 droplet size distribution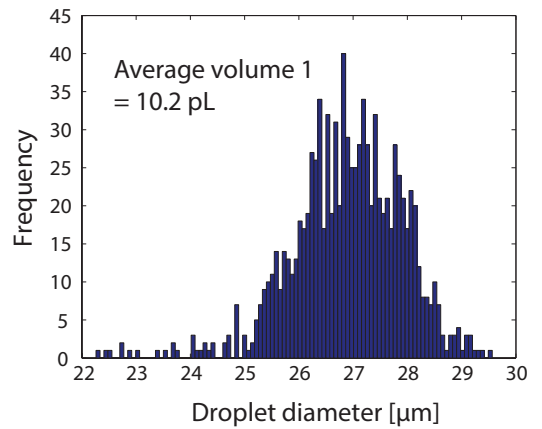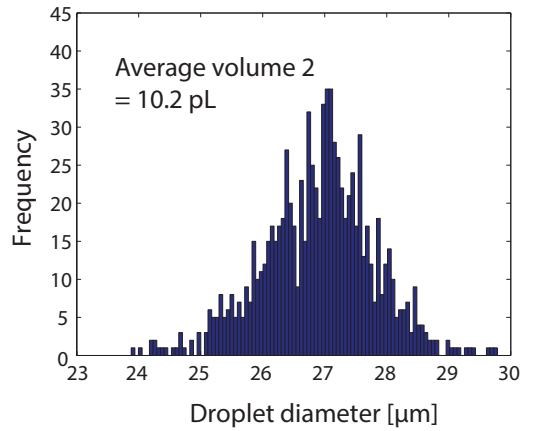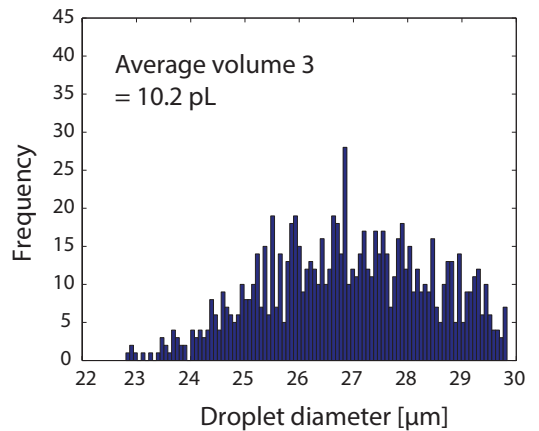**C**

| Run | Positive drops (%) | $\lambda$ (particles/drop) | Virus conc. (/mL) |
|-----|--------------------|----------------------------|-------------------|
| 1   | 7.67               | 0.0798                     | $7.82 \cdot 10^6$ |
| 2   | 5.49               | 0.0565                     | $5.54 \cdot 10^6$ |
| 3   | 5.46               | 0.0561                     | $5.35 \cdot 10^6$ |
