# Supplementary material
Source: PubMed Central journal article supplement (PMC5531043)
Supplement: NIHMS841916-supplement-2.pdf [file NIHMS841916-supplement-2.pdf]

### A T4 digital PCR readings

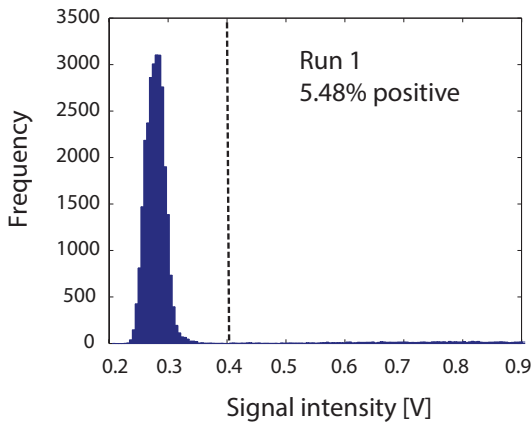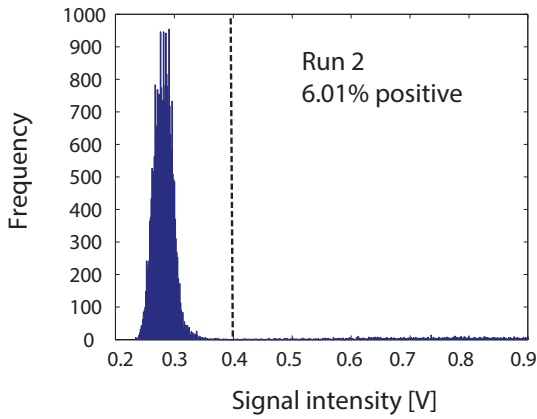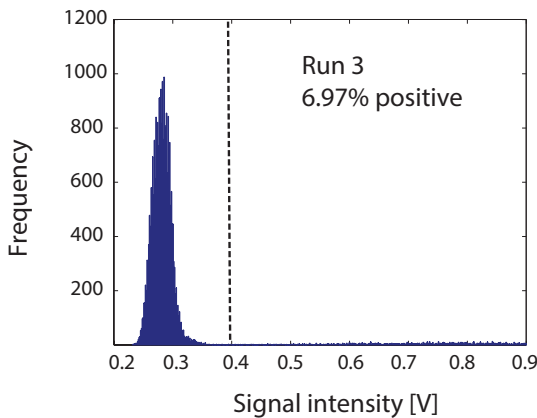

### B T4 droplet size distribution

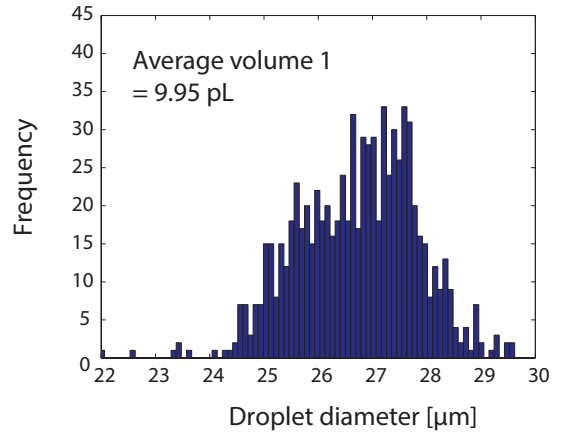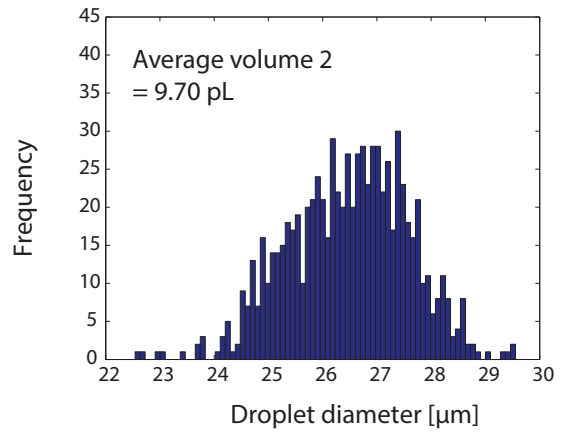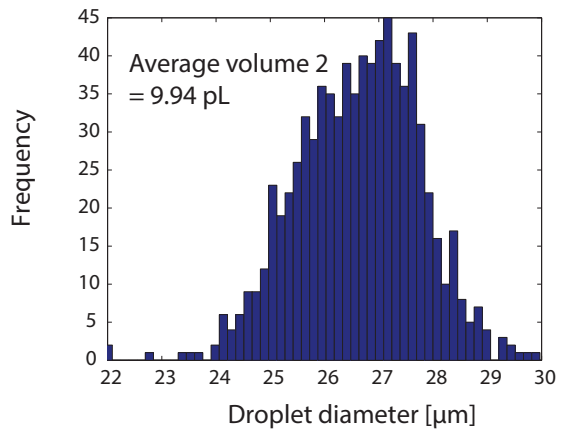

### C

| Run | Positive drops (%) | $\lambda$ (particles/drop) | Virus conc. (/mL) |
|-----|--------------------|----------------------------|-------------------|
| 1   | 5.48               | 0.0798                     | $8.02 \cdot 10^6$ |
| 2   | 6.01               | 0.0565                     | $5.82 \cdot 10^6$ |
| 3   | 6.97               | 0.0722                     | $7.26 \cdot 10^6$ |
